# Supplementary material for: High-dose regimens of hypomethylating agents promote transfusion independence in IPSS lower-risk myelodysplastic syndromes: a meta-analysis of prospective studies
Source: Aging (Albany NY). 2021 Mar 26;13(8):11120–34. doi: 10.18632/aging.202767 (PMC8109092; doi:10.18632/aging.202767)
Supplement: Supplementary Table 1 [file aging-13-202767-s002.xls]

## Sheet: Sheet1
Supplementary Table 1. Baseline characteristics.
																IPSS-R risk group							WHO Entities												Cytogenetic risk (IPSS)
	Agents	IPSS risk group: low:int-1(n)	Median age (range)	Gender: male	del-5q	TD anemia3	Median time from diagnosis, months	Prior therapies4	Median EPO level (U/L)	Median ANC, ×109/L	Median Hb, g/dL	Median RBC U/mo	Median ferritin level, ng/mL	BM blasts percentage	Blast >5% n(%)	very low	low	int	high	very high	missing		RCUD	RCMD	RCMD-RS	MDS-RS (RARS)	RA	MDS-EB (RAEB)	5q-	MDS-U	MDS/MPN-U	CMML	missing		Good (favorable)	Intermediate	Poor (unfavorable & failure)	missing
Jabbour E,2017	DAC	16:57(73)	70(44-88)	NA	0	39	0.9(0-31)	12	NA	NA	NA	NA	NA	2(0-10)	21	10	25	21	16	1	0		10	29		2	0	14	0	6	2	10	0		43	17	10	3
	AZA	6:34(40)	70(53-85)	NA	2	20	0.6(0-39)	10	NA	NA	NA	NA	NA	3(0-10)	11	4	16	13	7	0	0		5	11		1	0	11	2	0	4	6	0		26	13	1	0
	overall	22:91(113)	70(44-88)	NA	2	59	0.7(0-39)	22	NA	NA	NA	NA	NA	3(0-10)	32	14	41	34	23	1	0		15	40	0	3	0	25	2	6	6	16	0		69	30	11	3
Garcia-Manero, G.,2016	oAZA-14days	6:22(28)	72.5(51-85)	NA	1	20	NA	16	NA	1.3(0-21.5)	8.6(6.4-13)	NA	NA	NA	NA	11		7	9	1	0		0	10		9		4	1	3	0	0	1		12	9		6
	oAZA-21days	8:19(27)	70(31-87)	NA	1	18	NA	10	NA	1.8(0.4-30.3)	8.7(6-11.6)	NA	NA	NA	NA	14		7	6	0	0		0	7		9		5	1	3	0	0	2		15	10		2
	overall	14:41(55)	72(31-87)	NA	2	38	NA	26	NA	1.6(0-30.3)	8.7(6-13)	NA	NA	NA	NA	0	25	14	15	1	0		0	17		18		9	2	6	0	0	3		27	19		8
Garcia-Manero, G.,2013	DAC-A	12:31(43)	67±142	25	2	21	3.7(0.2-118)	NA	NA	NA	NA	NA	NA	NA	16(n=37)	NA	NA	NA	NA	NA	NA		NA	NA		NA	NA	NA	2	NA	NA	NA	41		31	9	3	0
	DAC-B	7:15(22)	71±10	20	1	12	3.2(0-51)	NA	NA	NA	NA	NA	NA	NA	6(n=27)	NA	NA	NA	NA	NA	NA		NA	NA		NA	NA	NA	1	NA	NA	NA	21		16	5	1	0
	Overall	19:46(65)	68±13	45	3	33	3.6(0-118)	NA	NA	NA	NA	NA	NA	NA	22(n=64)	NA	NA	NA	NA	NA	NA		NA	NA	NA	NA	NA	NA	3	NA	NA	NA	62		47	14	4	0
Thépot, S. 2016	AZA	19:29(49)1	71.6(67.2-78.1)	34	0	49	NA	NA	NA	NA	NA	6(6-8)	1432(1017-1928)	NA	NA	1	41	5	0	0	2		0	14		24	2	5	0	0	0	3	1		35	13	1	0
	AZA+EPO	19:30(49)	73.3(62.2-77.6)	34	0	49	NA	NA	NA	NA	NA	6(6-8)	1512(1003-2130)	NA	NA	0	36	9	0	0	4		0	17		17	4	7	0	0	0	4	0		42	5	2	0
	Overall	38:59(98)1	72.5(62.2-78.1)	68	0	98	NA	NA	NA	NA	NA	6(6-8)	1472(1003-2130)	NA	NA	1	77	14	0	0	6		0	14	17	41	6	12	0	0	0	7	1		77	18	3	0
Grinblatt, D. L., 2015	AZA	50:178(228)	75(29-91)	160	3	116	3(0-125)	NA	NA	1.9(0.1-976)5	9.5(5.4-17.3)6	NA	NA	NA	64(n=28)	NA	NA	NA	NA	NA	NA		0	48	2	28	35	38	3	12	0	8	54		175	23	22	8
Sanchez-Garcia, J. 2018	AZA	NA(20)	76.1(50-85)	14	0	20	8.8(3-176)	0	484(78-2000)	1.79(0.21-9.76)	8.6(6.8-9.9)	NA	1158(91-7157)	NA	NA	NA	NA	NA	NA	NA	NA		NA	NA	NA	NA	NA	NA	NA	NA	NA	NA	20		NA	NA	NA	NA
Filì, C. 2013	AZA	15:17(32)	71(56-84)	22	0	30	20(1-101)	22	NA	NA	NA	4(0-8)	NA	NA	NA	NA	NA	NA	NA	NA	NA		0	6	0	6	15	5	0	0	0	0	0		23	5	2	2
Tobiasson, M. 2014	AZA	6:24(30)	69(55-80)	21	1	NA	NA	NA	443(23-2313)	1.7(0.3-15.1)	NA	NA	1891(220-6230)	2(0-9)	NA	0	15	15	0	0	0		2	13	5	2	1	3	1	0	3	0	0		20	10	0	0
Sayar, H. 2011	AZA	NA(14)	69(59-85)	13	0	14	NA	NA	NA	NA	NA	NA	NA	4.5(1-9)	6(n=14)	NA	NA	NA	NA	NA	NA		0	1	4	1	0	6	0	0	1	1	0		10	3	1	0
11missing data; 2Mean Age ± SD; 3RBC or PLT TD; 4Growth factors: ESA, GSCF; 5n=207; 6n=224
