# Supplementary material for: High-dose regimens of hypomethylating agents promote transfusion independence in IPSS lower-risk myelodysplastic syndromes: a meta-analysis of prospective studies
Source: Aging (Albany NY). 2021 Mar 26;13(8):11120–34. doi: 10.18632/aging.202767 (PMC8109092; doi:10.18632/aging.202767)
Supplement: Supplementary Table 2 [file aging-13-202767-s003.xls]

## Sheet: TableS2
Supplementary Table 2. Characteristics of included studies.
Study	Agents	IWG criteria	Diagnose criteria	Ways of Administration	Number of Low-risk	Number of Int-1-risk	Trial Number	Schedule	LR-MDS Baseline and/or adverse events
Filì, C. 2013	AZA	2006	WHO	SC	15	17	NCT00897130	75 mg/sqm/d SC AZA × 5 days every 28 days	Yes
Garcia-Manero, G.,2013	DAC	2006	WHO	SC	19	46	NCT00619099	20 mg/sqm/d SC DAC × 3 days every 28 days; 20 mg/sqm/d SC DAC 1-8-15 every 28 days	Yes
Garcia-Manero, G.,2016	AZA	2006	WHO	ORAL	14	41	NCT00528983	300mg/d oral AZA × 14 or 21 days every 28 days	Yes
Grinblatt, D. L., 2015	AZA	2000	WHO	SC, IV	50	178	NCT00481273	75 mg/sqm/d SC/IV AZA × 7, 5-2-2, 5 days every 28 days	Yes
Iastrebner, M.2010	DAC	2006	WHO, FAB	IV	3	54	Unknown	20 mg/sqm/d IV DAC × 5 days every 28 days	No
Jabbour E,2017	DAC	2006	WHO	IV	16	57	NCT01720225	20 mg/sqm/d IV DAC × 3 days every 28 days	Yes
Jabbour E,2017	AZA	2006	WHO	SC, IV	6	34	NCT01720225	75 mg/sqm/d IV/SC AZA × 3 days every 28 days	Yes
Jeong, S. H. 2015	DAC	2006	WHO	IV	0	86	NCT01400633	20 mg/sqm/d IV DAC × 5 days every 28 days	No
Kantarjian, H.2006	DAC	2000	FAB	IV	0	28	NCT00043381	15 mg/sqm/8h IV DAC × 3 days every 42 days; best supportive care	No
Lee, J. H.2011	DAC	2006	WHO	IV	0	52	NCT01041846	20 mg/sqm/d IV DAC × 5 days every 28 days	No
Martin, M. G., 2009	AZA	2006	FAB	IV	1	8	NCT00384956	75 mg/sqm/d IV AZA × 5 days every 28 days	No
Morita, Y.,2018	AZA	2006	FAB	SC, IV	8	36	UMIN000005662	75 mg/sqm/d SC/IV AZA × 5 days every 28 days	No
Sanchez-Garcia, J.2018	AZA	2006	WHO	SC	NA	NA	NCT01338337	75 mg/sqm/d SC AZA × 5 days every 28 days; best supportive care	Yes
Sayar, H. 2011	AZA	2000	WHO	SC	NA	NA	NCT00379912	50 mg/sqm/d SC AZA 2-week 1-3-5 every 28 days ± 60,000IU SC EPO	Yes
Steensma, D. P.2009	DAC	2006	FAB	IV	1	52	NCT00260065	20 mg/sqm/d IV DAC × 5 days every 28 days	No
Thépot, S. 2016	AZA	2000, 2006	WHO	SC	38	59	NCT01015352	50 mg/sqm/d SC AZA × 5 days every 28 days ± 60,000IU SC EPO	Yes
Tobiasson, M. 2014	AZA	2006	WHO	SC	6	24	NCT01048034	75 mg/sqm/d SC AZA × 5 days every 28 days	Yes
Uchida, T.2011	AZA	2006	FAB	SC, IV	0	23	Unknown	75 mg/sqm/d SC/IV AZA × 7 days every 28 days	No
Wijermans, P. 2000	DAC	Not suitable	FAB	IV	0	16	Unknown	15 mg/sqm/8h IV DAC × 3 days every 42 days	No
Wu, D. 2015	DAC	2006	FAB	IV	0	55	NCT01751867	15 mg/sqm/8h IV DAC × 3 days every 42 days; 20 mg/sqm/d IV DAC × 3 days every 28 days	No
